# Supplementary material for: Tracking trash to treasure: in situ monitoring of single microbial cell oil biosynthesis from waste cooking oil using Raman spectroscopy and imaging
Source: Royal Society of Chemistry journal article supplement (doi:10.1039/d4ra05187d), 2024-01-01
Supplement: d4ra05187d1.pdf [file d4ra05187d1.pdf]

## Tracking Trash to Treasure: *In situ* monitoring of Single Microbial Cell Oil biosynthesis from Waste Cooking Oil using Raman Spectroscopy and Imaging

Jiro Karlo<sup>a</sup>, Victor Carrasco-Navarro<sup>b</sup>, Arto Koistinen<sup>c</sup>, Surya Pratap Singh<sup>a\*</sup>

<sup>a</sup>Department of Biosciences and Bioengineering, Indian Institute of Technology Dharwad, Dharwad, Karnataka, India - 580011

<sup>b</sup>Department of Environmental and Biological Sciences, University of Eastern Finland, Kuopio Campus, Yliopistonranta 8, Kuopio, Finland – 70210

<sup>c</sup>Department of Technical Physics, University of Eastern Finland, Kuopio, Finland - 70210

### Supplementary Information:

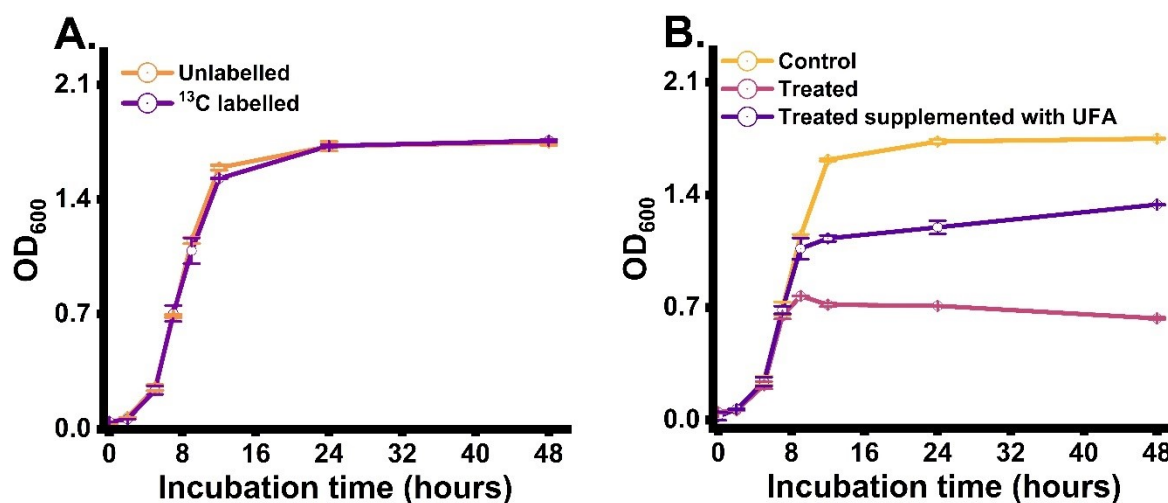

**Fig. S1** Growth monitoring of *Yarrowia Lipolytica* (A) YL grown in carbon source-free synthetic medium with unlabelled glucose and <sup>13</sup>C labelled glucose as the sole carbon source supplement. (B) YL grown in culture medium without cerulenin treatment, with cerulenin treatment at 8 h and cerulenin treated medium with exogenous UFA.

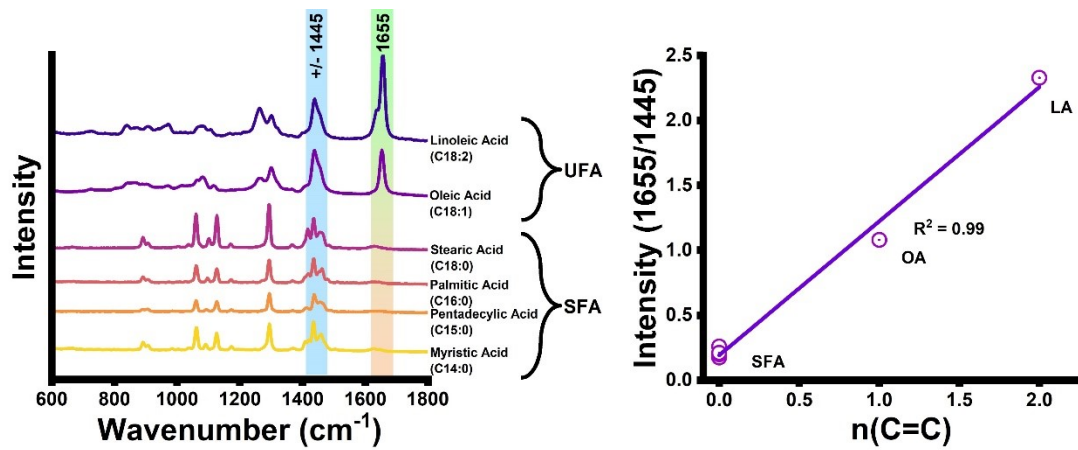

**Fig. S2** Raman analysis of standard SFA and UFA. A. Raman spectra of fatty acid B. Quantifying degree of unsaturation from Raman spectra by plotting the ratiometric Raman intensity (1655/1445) to the number of C=C. SFA = Saturated fatty Acid; UFA = Unsaturated Fatty Acid; OA = Oleic Acid; LA = Linoleic Acid.

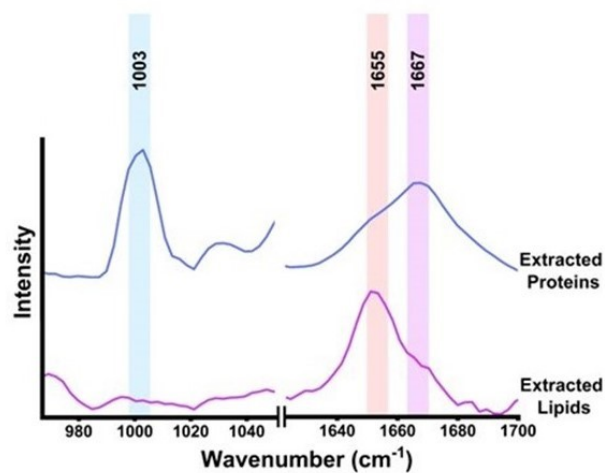

**Fig. S3** Reference peak positions from extracted protein and lipid from cells after 24 h.

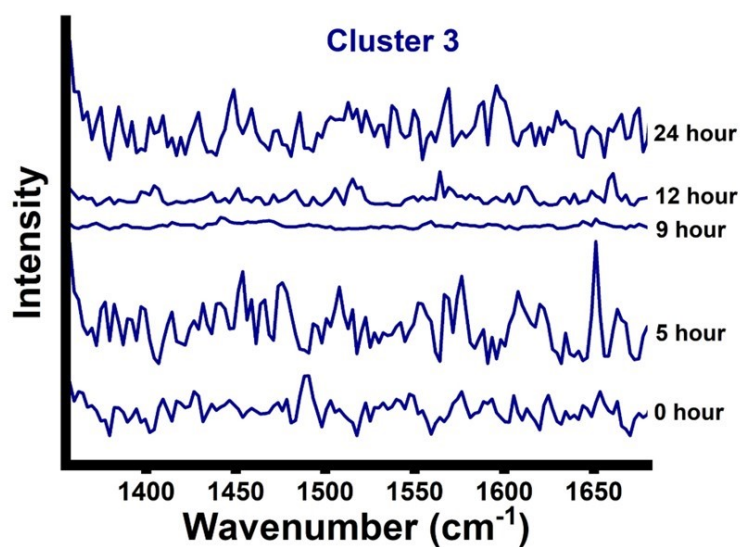

Fig. S4 K- means cluster component 3 of different time points.

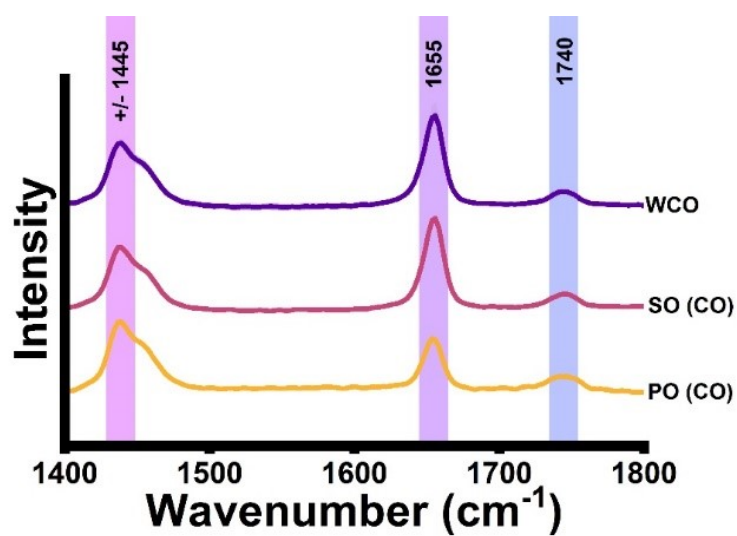

Fig. S5 Raman spectra of Oils used as only carbon source; Cooking Oil (CO) - Palmolein Oil (PO) and Sunflower Oil (SO) and Waste cooking oil (WCO).

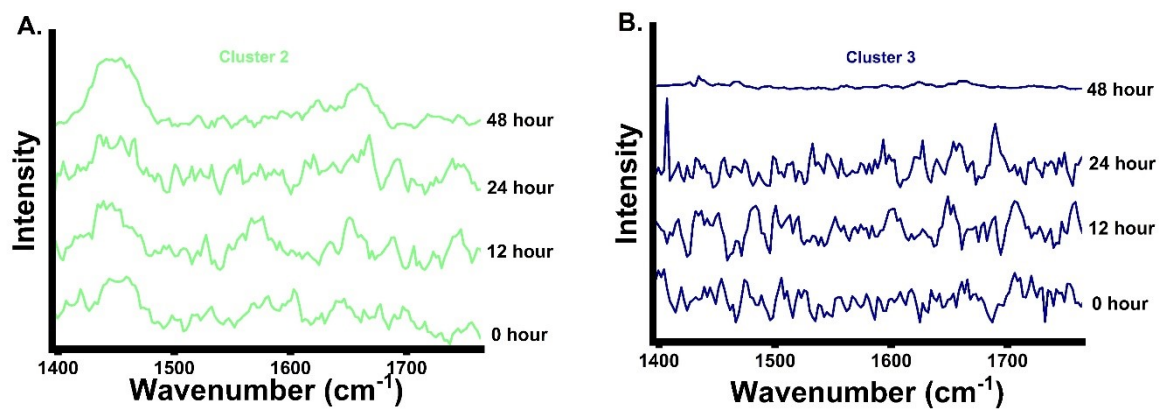

Fig. S6 K- means cluster components of different time points; (A) Cluster 2 (B) Cluster 3
